# Supplementary material for: “Bicycles May Use Full Lane” Signage Communicates U.S. Roadway Rules and Increases Perception of Safety
Source: PLOS journal article supplement (doi:10.1371/journal.pone.0136973), 2015-08-28
Supplement: S4 (10.1371/journal.pone.0136973.s004) [file journal.pone.0136973.s004]

## S2. Methods. Images for all four treatments, shown here for the two-lane roadway.

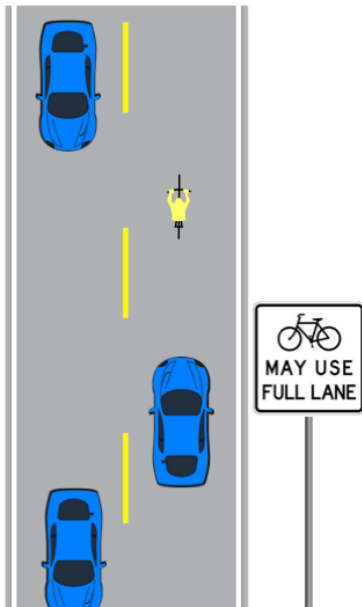

“Bicycles May Use Full Lane” signage.

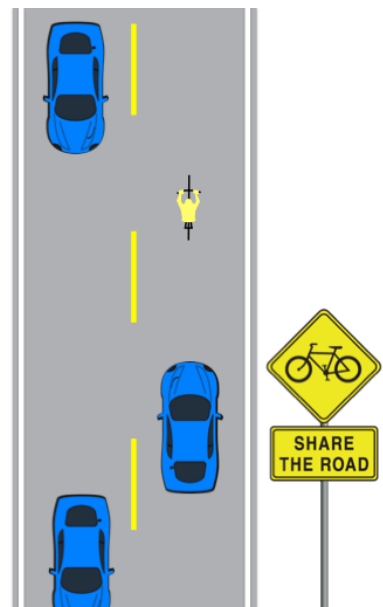

“Share the Road” signage.

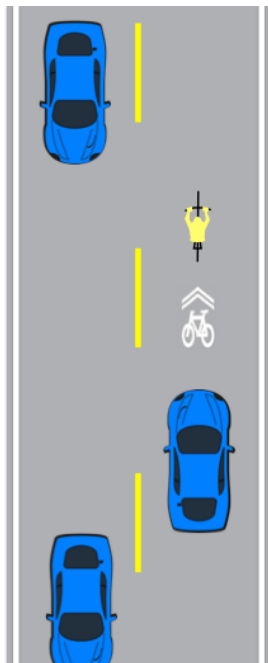

Shared Lane Markings  
on roadway pavement.

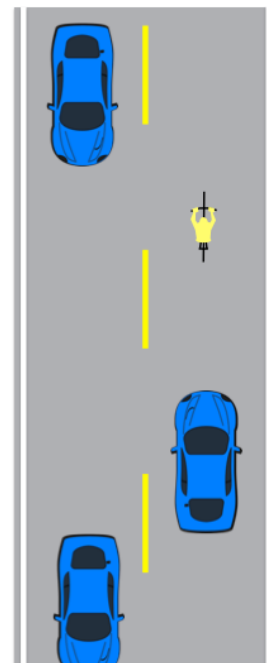

Control treatment – no  
bicycle-related signage or  
pavement markings.
